# Supplementary material for: Structural Analysis of the Health Literacy Facet Access to Information on General Health, COVID-19 Infection Prevention, and Early Childhood Allergy Prevention in Pregnant Women and Mothers of Infants
Source: Atypon-hosted journal article supplement (doi:10.1026/0012-1924/a000295), 2022-09-12
Supplement: 0012-1924_a000295_esm1.pdf [file 0012-1924_a000295_esm1.pdf]

*ESM I*: Study sample characteristics of the  $N = 343$  (expectant) mothers of infants

|                                                                                                 | <i>M (SD) / [Min, Median, Max]</i><br><i>or N (%)</i> |
|-------------------------------------------------------------------------------------------------|-------------------------------------------------------|
| <b>Age</b>                                                                                      | 32.15 (4.72) / [18, 32, 50]                           |
| <b>Women with at least one child</b>                                                            | 281 (82 %)                                            |
| Number of children                                                                              | 1.48 (0.85) / [0, 1, 5]                               |
| Age of youngest child in month                                                                  | 15.60 (10.94) / [0, 13, 50]                           |
| <b>Pregnant women</b>                                                                           | 62 (18.1 %)                                           |
| <b>Primipara</b>                                                                                | 170 (52.19)                                           |
| <b>Marital status</b>                                                                           |                                                       |
| Married                                                                                         | 240 (70.0 %)                                          |
| Single, but living with a steady partner                                                        | 87 (25.4 %)                                           |
| Single parent                                                                                   | 14 (4.1 %)                                            |
| Registered civil partnership                                                                    | 1 (0.3 %)                                             |
| Other                                                                                           | 2 (0.6 %)                                             |
| <b>Nationality: German</b>                                                                      | 331 (96.5 %)                                          |
| <b>Mother tongue: German</b>                                                                    | 329 (95.9 %)                                          |
| <b>School graduation</b>                                                                        |                                                       |
| University entrance qualification / High school diploma („Abitur“)                              | 156 (45.4 %)                                          |
| Advanced technical college entrance qualification. completion of a specialized secondary school | 27 (7.9 %)                                            |
| Secondary school diploma („Mittlere Reife“)                                                     | 139 (40.5 %)                                          |
| Elementary school diploma („Hauptschulabschluss“)                                               | 15 (4.4 %)                                            |
| Other                                                                                           | 6 (1.8 %)                                             |
| <b>Occupation</b>                                                                               |                                                       |
| Employee                                                                                        | 227 (66.2 %)                                          |

|                                                                |                               |
|----------------------------------------------------------------|-------------------------------|
| Civil servant                                                  | 26 (7.6 %)                    |
| Worker                                                         | 24 (7.0 %)                    |
| Vocational training / qualification                            | 15 (4.4 %)                    |
| Self-employed                                                  | 6 (1.7 %)                     |
| University graduate in the liberal professions                 | 7 (2.0 %)                     |
| Other                                                          | 38 (11.1 % <sub>valid</sub> ) |
| <hr/>                                                          |                               |
| <b>Subjective socioeconomic state<sup>a)</sup></b>             | 5.87 (1.42) / [1, 6, 10]      |
| <hr/>                                                          |                               |
| <b>COVID-19 vaccination status</b>                             |                               |
| Completely vaccinated                                          | 221 (64.4 %)                  |
| Second vaccination required                                    | 31 (9.0 %)                    |
| No vaccination                                                 | 91 (26.5 %)                   |
| <hr/>                                                          |                               |
| <b>Already infected with the COVID-19 virus</b>                | 25 (7.3 %)                    |
| <hr/>                                                          |                               |
| <b>Severe COVID-19 progression in the personal environment</b> | 68 (19.8 %)                   |
| <hr/>                                                          |                               |

Notes: <sup>a)</sup> McArthur-Scale: 1 = low to 10 = high
