# Supplementary material for: Structural Analysis of the Health Literacy Facet Access to Information on General Health, COVID-19 Infection Prevention, and Early Childhood Allergy Prevention in Pregnant Women and Mothers of Infants
Source: Atypon-hosted journal article supplement (doi:10.1026/0012-1924/a000295), 2022-09-12
Supplement: 0012-1924_a000295_esm2.pdf [file 0012-1924_a000295_esm2.pdf]

## Frage 5 (Access General Health)

Bitte geben Sie Ihre persönliche Einschätzung ab.

Bitte kreuzen Sie an, was Ihnen spontan einfällt. Wenn Sie noch nie gezielt nach solchen Informationen gesucht haben, stellen Sie sich bitte vor, wie einfach oder leicht es Ihnen fallen würde.

| Wie einfach/schwierig ist es für Sie ...                                                                                                                                 | Sehr schwierig        | Ziemlich schwierig    | Ziemlich einfach      | Sehr einfach          |
|--------------------------------------------------------------------------------------------------------------------------------------------------------------------------|-----------------------|-----------------------|-----------------------|-----------------------|
| Informationen über Krankheitssymptome, die Sie betreffen, zu finden?                                                                                                     | <input type="radio"/> | <input type="radio"/> | <input type="radio"/> | <input type="radio"/> |
| Informationen über Therapien für Krankheiten, die Sie betreffen, zu finden?                                                                                              | <input type="radio"/> | <input type="radio"/> | <input type="radio"/> | <input type="radio"/> |
| herauszufinden, was im Falle eines medizinischen Notfalls zu tun ist?                                                                                                    | <input type="radio"/> | <input type="radio"/> | <input type="radio"/> | <input type="radio"/> |
| herauszufinden, wo Sie professionelle Hilfe erhalten, wenn Sie krank sind?                                                                                               | <input type="radio"/> | <input type="radio"/> | <input type="radio"/> | <input type="radio"/> |
| Informationen über Unterstützungsmöglichkeiten bei ungesundem Verhalten, wie Rauchen, wenig Bewegung oder zu hohem Alkoholkonsum, zu finden?                             | <input type="radio"/> | <input type="radio"/> | <input type="radio"/> | <input type="radio"/> |
| Wie einfach/schwierig ist es für Sie ...                                                                                                                                 | Sehr schwierig        | Ziemlich schwierig    | Ziemlich einfach      | Sehr einfach          |
| Informationen über Unterstützungsmöglichkeiten bei psychischen Problemen, wie Stress oder Depression, zu finden?                                                         | <input type="radio"/> | <input type="radio"/> | <input type="radio"/> | <input type="radio"/> |
| Informationen über empfohlene Impfungen und Vorsorgeuntersuchungen zu finden?                                                                                            | <input type="radio"/> | <input type="radio"/> | <input type="radio"/> | <input type="radio"/> |
| Informationen darüber zu finden, wie man bestimmte Gesundheitsrisiken vermeiden oder damit umgehen kann, wie Übergewicht, hoher Blutdruck oder hoher Cholesterinspiegel? | <input type="radio"/> | <input type="radio"/> | <input type="radio"/> | <input type="radio"/> |
| Informationen über gesundheitsfördernde Verhaltensweisen, wie Bewegung und gesunde Ernährung, zu finden?                                                                 | <input type="radio"/> | <input type="radio"/> | <input type="radio"/> | <input type="radio"/> |

| Wie einfach/schwierig ist es für Sie ...                                                                         | Sehr schwierig        | Ziemlich schwierig    | Ziemlich einfach      | Sehr einfach          |
|------------------------------------------------------------------------------------------------------------------|-----------------------|-----------------------|-----------------------|-----------------------|
| Informationen zu finden, wie Ihre Wohnumgebung gesundheitsförderlicher werden könnte?                            | <input type="radio"/> | <input type="radio"/> | <input type="radio"/> | <input type="radio"/> |
| etwas über politische Veränderungen herauszufinden, die Auswirkungen auf die Gesundheit haben könnte?            | <input type="radio"/> | <input type="radio"/> | <input type="radio"/> | <input type="radio"/> |
| sich über Angebote zur Gesundheitsförderung am Arbeitsplatz, in der Schule oder Kommune/Gemeinde zu informieren? | <input type="radio"/> | <input type="radio"/> | <input type="radio"/> | <input type="radio"/> |

Die folgenden Fragen beziehen sich auf das Finden von Informationen zur Vorbeugung von Allergien bei Kindern.

### Frage 3 (Access ECAP)

**Bitte geben Sie Ihre persönliche Einschätzung ab.**

Bitte kreuzen Sie an, was Ihnen spontan einfällt. Wenn Sie noch nie gezielt nach solchen Informationen gesucht haben, stellen Sie sich bitte vor, wie einfach oder leicht es Ihnen fallen würde.

| Wie einfach/schwierig ist es für Sie ...                                                                                                                            | Sehr schwierig        | Ziemlich schwierig    | Ziemlich einfach      | Sehr einfach          |
|---------------------------------------------------------------------------------------------------------------------------------------------------------------------|-----------------------|-----------------------|-----------------------|-----------------------|
| Informationen über Allergiesymptome, die Ihr Kind betreffen könnten, zu finden?                                                                                     | <input type="radio"/> | <input type="radio"/> | <input type="radio"/> | <input type="radio"/> |
| Informationen über Behandlungsmöglichkeiten zu Allergien, die Ihr Kind betreffen könnten, zu finden?                                                                | <input type="radio"/> | <input type="radio"/> | <input type="radio"/> | <input type="radio"/> |
| herauszufinden, was Sie beachten müssen, um in einem Notfall (z. B. allergischer Schock) richtig reagieren zu können?                                               | <input type="radio"/> | <input type="radio"/> | <input type="radio"/> | <input type="radio"/> |
| herauszufinden, wo Sie professionelle Hilfe erhalten, wenn Ihr Kind Symptome einer Allergie zeigt?                                                                  | <input type="radio"/> | <input type="radio"/> | <input type="radio"/> | <input type="radio"/> |
| Informationen über Unterstützungsmöglichkeiten zu finden, wenn Ihr Kind ein erhöhtes Allergierisiko hat?                                                            | <input type="radio"/> | <input type="radio"/> | <input type="radio"/> | <input type="radio"/> |
| Wie einfach/schwierig ist es für Sie ...                                                                                                                            | Sehr schwierig        | Ziemlich schwierig    | Ziemlich einfach      | Sehr einfach          |
| Informationen über Unterstützungsmöglichkeiten zu finden, wenn Sie sich aufgrund gesundheitlicher Probleme Ihres Kindes (z. B. Allergie) psychisch belastet fühlen? | <input type="radio"/> | <input type="radio"/> | <input type="radio"/> | <input type="radio"/> |
| Informationen über empfohlene Impfungen und Vorsorgeuntersuchungen für Ihr Kind zu finden?                                                                          | <input type="radio"/> | <input type="radio"/> | <input type="radio"/> | <input type="radio"/> |
| Informationen darüber zu finden, wie man bestimmte Allergierisiken (z. B. Ernährung) vermeiden oder damit umgehen kann.                                             | <input type="radio"/> | <input type="radio"/> | <input type="radio"/> | <input type="radio"/> |

| Wie einfach/schwierig ist es für Sie...                                                                                          | Sehr schwierig        | Ziemlich schwierig    | Ziemlich einfach      | Sehr einfach          |
|----------------------------------------------------------------------------------------------------------------------------------|-----------------------|-----------------------|-----------------------|-----------------------|
| Informationen zu Verhaltensweisen (z. B. Bewegung, gesunde Ernährung) zu finden, die der Gesundheit Ihres Kindes guttun können?  | <input type="radio"/> | <input type="radio"/> | <input type="radio"/> | <input type="radio"/> |
| Informationen zu finden, wie Sie durch eine gesundheitsförderliche Wohnumgebung Allergien bei Ihrem Kind vermeiden können?       | <input type="radio"/> | <input type="radio"/> | <input type="radio"/> | <input type="radio"/> |
| Informationen über neue Erkenntnisse zu finden, die dazu beitragen, Probleme aufgrund von Allergien bei Ihrem Kind zu vermeiden? | <input type="radio"/> | <input type="radio"/> | <input type="radio"/> | <input type="radio"/> |
| sich über Angebote zur frühkindlichen Gesundheitsförderung in der Kommune/Gemeinde oder Kita zu informieren?                     | <input type="radio"/> | <input type="radio"/> | <input type="radio"/> | <input type="radio"/> |

### Frage 3 (Access COVID-19-IP)

Die folgenden Fragen beziehen sich auf das Finden von Informationen zur Vorbeugung einer Corona-Infektion.

**Bitte geben Sie Ihre persönliche Einschätzung ab und kreuzen Sie an, was Ihnen spontan einfällt. Wenn Sie noch nie gezielt nach solchen Informationen gesucht haben, stellen Sie sich bitte vor, wie einfach oder leicht es Ihnen fallen würde.**

| Wie einfach/schwierig ist es für Sie ...                                                                                                            | Sehr einfach          | Ziemlich einfach      | Ziemlich schwierig    | Sehr schwierig        |
|-----------------------------------------------------------------------------------------------------------------------------------------------------|-----------------------|-----------------------|-----------------------|-----------------------|
| Informationen über Symptome einer Coronainfektion zu finden?                                                                                        | <input type="radio"/> | <input type="radio"/> | <input type="radio"/> | <input type="radio"/> |
| Informationen über Behandlungsmöglichkeiten einer Coronainfektion zu finden?                                                                        | <input type="radio"/> | <input type="radio"/> | <input type="radio"/> | <input type="radio"/> |
| herauszufinden, was im Falle einer Coronainfektion zu tun ist?                                                                                      | <input type="radio"/> | <input type="radio"/> | <input type="radio"/> | <input type="radio"/> |
| herauszufinden, wo Sie professionelle Hilfe erhalten, wenn sie Symptome einer Coronainfektion zeigen?                                               | <input type="radio"/> | <input type="radio"/> | <input type="radio"/> | <input type="radio"/> |
| Informationen über Unterstützungsmöglichkeiten zu finden, wenn Sie ein erhöhtes Infektionsrisiko haben?                                             | <input type="radio"/> | <input type="radio"/> | <input type="radio"/> | <input type="radio"/> |
| Wie einfach/schwierig ist es für Sie ...                                                                                                            | Sehr einfach          | Ziemlich einfach      | Ziemlich schwierig    | Sehr schwierig        |
| Informationen über Unterstützungsmöglichkeiten zu finden, wenn Sie sich aufgrund der Corona Pandemie psychisch belastet fühlen?                     | <input type="radio"/> | <input type="radio"/> | <input type="radio"/> | <input type="radio"/> |
| Informationen über empfohlene Impfungen und Vorsorgeuntersuchungen zu finden?                                                                       | <input type="radio"/> | <input type="radio"/> | <input type="radio"/> | <input type="radio"/> |
| Informationen darüber zu finden, wie man bestimmte Infektionsrisiken vermeiden oder damit umgehen kann, wie Kontaktreduktion oder Hygienemaßnahmen? | <input type="radio"/> | <input type="radio"/> | <input type="radio"/> | <input type="radio"/> |

| Wie einfach/schwierig ist es für Sie ...                                                                                                                                      | Sehr einfach          | Ziemlich einfach      | Ziemlich schwierig    | Sehr schwierig        |
|-------------------------------------------------------------------------------------------------------------------------------------------------------------------------------|-----------------------|-----------------------|-----------------------|-----------------------|
| Informationen zu Verhaltensweisen zu finden, die trotz der Infektionsgefahr einen gesundheitsförderlichen Lebensstil (z. B. Bewegung, kontaktlose Kommunikation) ermöglichen? | <input type="radio"/> | <input type="radio"/> | <input type="radio"/> | <input type="radio"/> |
| Informationen zu finden, wie Sie durch eine gesundheitsförderliche Wohnumgebung eine Coronainfektion vermeiden können?                                                        | <input type="radio"/> | <input type="radio"/> | <input type="radio"/> | <input type="radio"/> |
| etwas über politische Veränderungen herauszufinden, die Auswirkungen auf das Infektionsgeschehen haben könnten?                                                               | <input type="radio"/> | <input type="radio"/> | <input type="radio"/> | <input type="radio"/> |
| sich über Angebote zur Vorbeugung einer Coronainfektion am Arbeitsplatz, in der Schule oder Kommune/Gemeinde zu informieren?                                                  | <input type="radio"/> | <input type="radio"/> | <input type="radio"/> | <input type="radio"/> |
