# Supplementary material for: Structural Analysis of the Health Literacy Facet Access to Information on General Health, COVID-19 Infection Prevention, and Early Childhood Allergy Prevention in Pregnant Women and Mothers of Infants
Source: Atypon-hosted journal article supplement (doi:10.1026/0012-1924/a000295), 2022-09-12
Supplement: 0012-1924_a000295_esm3.pdf [file 0012-1924_a000295_esm3.pdf]

ESM 3. Global model-fits and latent factor correlations for the test structural models in the domains General Health, COVID-19-IP and ECAP

|                                  | $\chi^2$ | <i>df</i> | <i>p</i> | TLI  | CFI  | RMSEA | SRMR | $r_{GH, COVID-19-IP} / r_{GH, ECAP} /$<br>$r_{COVID-19-IP, ECAP}$ |
|----------------------------------|----------|-----------|----------|------|------|-------|------|-------------------------------------------------------------------|
| <b>General Health</b>            |          |           |          |      |      |       |      |                                                                   |
| 1-DIM                            | 689.78   | 54        | <.001    | .833 | .864 | .185  | .093 |                                                                   |
| 3-DIM                            | 390.11   | 51        | <.001    | .906 | .927 | .139  | .070 | .731, .648, 1.049                                                 |
| Bi-factor <sup>a)</sup>          | -        | -         | -        | -    | -    | -     | -    |                                                                   |
| 3-DIM <sup>GH-MOD-DEV; b)</sup>  | 247.90   | 52        | <.001    | .909 | .929 | .148  | .077 | .697, .687, .830                                                  |
| 3-DIM <sup>GH-MOD-CON; c)</sup>  | 183.45   | 52        | <.001    | .901 | .918 | .122  | .078 | .691, .502, .665                                                  |
| 3-DIM <sup>GH-MOD</sup>          | 357.78   | 52        | <.001    | .912 | .931 | .135  | .071 | .673, .576, .739                                                  |
| Bi-factor <sup>3DIM-GH-MOD</sup> | 162.60   | 62        | <.001    | .961 | .974 | .090  | .041 |                                                                   |
| <b>COVID-19-IP</b>               |          |           |          |      |      |       |      |                                                                   |
| 1-DIM                            | 305.95   | 54        | <.001    | .924 | .938 | .117  | .068 |                                                                   |
| 3-DIM                            | 199.30   | 51        | <.001    | .953 | .963 | .092  | .055 | .921, .733, .891                                                  |
| Bi-factor <sup>3DIM</sup>        | -        | -         | -        | -    | -    | -     | -    |                                                                   |
| Bi-factor <sup>3DIM-GH-MOD</sup> | 190.57   | 62        | <.001    | .966 | .968 | .078  | .069 |                                                                   |

| <b>ECAP</b>                       |        |    |       |      |      |      |      |                  |
|-----------------------------------|--------|----|-------|------|------|------|------|------------------|
| 1-DIM                             | 434.26 | 54 | <.001 | .901 | .919 | .143 | .064 |                  |
| 3-DIM                             | 331.69 | 51 | <.001 | .923 | .940 | .127 | .056 | .879, .784, .950 |
| 3-DIM <sup>ECAP-MOD-DEV; b)</sup> | 172.38 | 51 | <.001 | .950 | .961 | .117 | .055 | .757, .676, .784 |
| 3-DIM <sup>ECAP-MOD-CON; c)</sup> | 110.98 | 51 | <.001 | .959 | .968 | .083 | .053 | .863, .785, .856 |
| 3-DIM <sup>ECAP-MOD</sup>         | 222.04 | 51 | <.001 | .953 | .946 | .099 | .047 | .796, .722, .812 |
| Bifactor <sup>3DIM-GH-MOD</sup>   | 355.22 | 62 | <.001 | .934 | .938 | .117 | .077 |                  |
| Bifactor <sup>3DIM-ECAP-MOD</sup> | 148.80 | 42 | <.001 | .964 | .977 | .086 | .035 |                  |

*Notes:* GHP = General Health Prevention, ECAP = Early Childhood Allergy Prevention, COVID-19-IP = COVID-19 infection prevention; <sup>a)</sup> Not estimable (Matrix not positive definite); <sup>b)</sup> Developmental sample:  $n = 173$ ; Confirmatory/cross-validation sample:  $n = 170$
